# Supplementary material for: Dynamic Reversible Evolution of Wrinkles on Floating Polymer Films under Magnetic Control
Source: MDPI journal article supplement (doi:10.3390/coatings11050494), 2021-04-23
Supplement: s1 [file s1]

Archive with 3 entries (3 files):
- coatings-1178092-supplementary materials.pdf
- Video S1.mp4
- Video S2.mp4
